# Supplementary material for: Genetic variants predicting aerobic capacity response to training are also associated with skeletal muscle oxidative capacity in moderate-to-severe COPD
Source: PubMed Central journal article supplement (PMC6172613; doi:10.1152/physiolgenomics.00140.2017), 2018-05-25
Supplement: Appendix2-tables.pdf [file Appendix2-tables.pdf]

## Appendix 2 - Tables

**Table S1.** Participant characteristics.

|                                  | NHW (n= 84) |                          |         | AA (n = 68)          |                          |         |
|----------------------------------|-------------|--------------------------|---------|----------------------|--------------------------|---------|
|                                  | CON         | COPD                     | p-value | CON                  | COPD                     | p-value |
| <b>n</b>                         | 25          | 59                       | -       | 43                   | 25                       | -       |
| <b>Current smoker (n (%))</b>    | 3 (12)      | 14 (24)                  | -       | 34 (79)              | 14 (56)                  | -       |
| <b>Age (yrs)</b>                 | 67 (10)     | 68 (10)                  | NS      | 57 (5) <sup>§*</sup> | 62 (7) <sup>*</sup>      | NS      |
| <b>Weight (kg)</b>               | 79 (20)     | 78 (17)                  | NS      | 87 (21)              | 81 (16)                  | NS      |
| <b>Height (cm)</b>               | 167 (8)     | 168 (11)                 | NS      | 171 (10)             | 173 (8)                  | NS      |
| <b>BMI (kg/m<sup>2</sup>)</b>    | 28 (7)      | 28 (6)                   | NS      | 30 (7)               | 27 (5)                   | NS      |
| <b>Sex (M/F)</b>                 | 9/16        | 25/34                    | -       | 24/19                | 20/5                     | -       |
| <b>FVC (L)</b>                   | 3.3 (0.8)   | 3.1 (1.0)                | NS      | 3.3 (0.8)            | 3.0 (0.8)                | NS      |
| <b>FEV<sub>1</sub> (L)</b>       | 2.5 (0.6)   | 1.7 (0.8) <sup>#</sup>   | NS      | 2.6 (0.6)            | 1.8 (0.7) <sup>§</sup>   | NS      |
| <b>FEV<sub>1</sub> %pred (%)</b> | 98.9 (19.8) | 65.1 (26.7) <sup>#</sup> | NS      | 97.9 (13.0)          | 64.6 (22.7) <sup>§</sup> | NS      |
| <b>k (min<sup>-1</sup>)</b>      | 1.62 (0.09) | 1.30 (0.05) <sup>#</sup> | 0.007   | 1.59 (0.07)          | 1.18 (0.06) <sup>§</sup> | 0.0001  |
| <b>Step/day (n)</b>              | 6,589 (665) | 5,446 (538)              | NS      | 6,463 (505)          | 6,434 (1,188)            | NS      |

Data are mean (SD). NHW = non-Hispanic White; AA = African American; CON= smoker controls with normal spirometry; COPD = chronic obstructive pulmonary disease; BMI = body mass index; M = male; F = female; FVC = forced vital capacity; FEV<sub>1</sub> = forced expiratory volume in 1 second; k = muscle oxygen consumption recovery rate constant, proportional to muscle oxidative capacity. p≤0.05 vs: <sup>§</sup> NHW CON; <sup>\*</sup> NHW COPD; <sup>#</sup> AA CON

**Table S2.** Quality control of COPDGene genotyping.

| Study genotyping / QC |                                                           |                           |                               |                            |                                                                             |                           | SNP QC    |                |                 |                         |                 |
|-----------------------|-----------------------------------------------------------|---------------------------|-------------------------------|----------------------------|-----------------------------------------------------------------------------|---------------------------|-----------|----------------|-----------------|-------------------------|-----------------|
| Cohort Name           | Array used and version                                    | Genotype calling software | Related individuals (yes/no)? | Familial adjustment method | Population stratification assessment and adjustment                         | Analysis software version | MAF       | Call Rate      | HWE p-value     | # SNPs analysed post-QC | Other filtering |
| <i>COPDGene</i>       | Illumina Human Omni 1-Quad (Restricted to candidate SNPs) | <i>Illumina (GenCall)</i> | <i>no</i>                     | <i>NA</i>                  | <i>Exclusion based on PCA. Models adjusted for PCs for genetic ancestry</i> | <i>PLINK v1.9</i>         | <i>NA</i> | <i>&gt;98%</i> | <i>&gt;10-8</i> | <i>11</i>               | <i>No</i>       |

  

| Imputation information             |                                   |                                       |                              |            |                      | Sample QC        |                                                                                     |
|------------------------------------|-----------------------------------|---------------------------------------|------------------------------|------------|----------------------|------------------|-------------------------------------------------------------------------------------|
| Number of SNPs used for imputation | Imputation software               | Imputation backbone                   | Haplotypes used for backbone | NCBI build | Chr X imputed yes/no | Call Rate        | Other QC exclusions                                                                 |
| Illumina Human Omni 1-Quad         | <i>Michigan Imputation Server</i> | <i>Haplotype Reference Consortium</i> | <i>All</i>                   | <i>37</i>  | <i>No</i>            | <i>&gt;98.5%</i> | <i>IBS, pop strat, heterozygosity (Cho et al. Lancet Resp Med 3(4):264-6, 2015)</i> |

**Table S3.** Associations between candidate SNPs and muscle oxidative capacity inferred from *gastrocnemius* oxygen consumption recovery rate constant ( $k$ ) in the complete cohort (n=152). Associations were corrected for age, weight, FEV<sub>1</sub> %predicted, number of steps per day, and the principal components of genetic ancestry.

| rsID       | Locus name                         | Chr | Position    | EA/ALT | Trait       | EAF   | $\beta$ (SE)  | $P$   | N   | $I^2$ | Het_ $P$ |
|------------|------------------------------------|-----|-------------|--------|-------------|-------|---------------|-------|-----|-------|----------|
| rs11574    | <i>ID3</i> (nonsynonymous)         | 1   | 23,885,498  | C/T    | Gastroc $k$ | 0.829 | 0.024 (0.064) | 0.707 | 152 | 74.4  | 0.0481   |
| rs10497520 | <i>TTN</i> (nonsynonymous)         | 2   | 179,644,855 | T/C    | Gastroc $k$ | 0.309 | 0.109 (0.062) | 0.079 | 152 | 0     | 0.4725   |
| rs3770991  | <i>NRP2</i> (intronic)             | 2   | 206,655,739 | A/G    | Gastroc $k$ | 0.152 | 0.062 (0.076) | 0.413 | 152 | 43.5  | 0.1833   |
| rs2457571  | <i>SLC22A3</i> (intronic)          | 6   | 160,834,828 | T/C    | Gastroc $k$ | 0.352 | 0.106 (0.056) | 0.058 | 152 | 0     | 0.6574   |
| rs4257918  | <i>CPVL</i> (intronic)             | 7   | 29,053,849  | A/G    | Gastroc $k$ | 0.152 | 0.011 (0.07)  | 0.875 | 152 | 0     | 0.8882   |
| rs7386139  | <i>DEPTOR</i> (intronic)           | 8   | 121,027,419 | G/A    | Gastroc $k$ | 0.201 | 0.036 (0.066) | 0.581 | 152 | 0     | 0.7869   |
| rs6481619  | <i>SVIL</i> (intronic)             | 10  | 29,982,954  | A/C    | Gastroc $k$ | 0.763 | 0.059 (0.059) | 0.314 | 152 | 46.5  | 0.1717   |
| rs2792022  | <i>BTA1</i> (intronic)             | 10  | 93,740,429  | T/C    | Gastroc $k$ | 0.819 | 0.13 (0.067)  | 0.053 | 152 | 0     | 0.9114   |
| rs2251375  | <i>H19</i> (ncRNA intronic)        | 11  | 2,019,496   | C/A    | Gastroc $k$ | 0.520 | 0.057 (0.052) | 0.278 | 152 | 0     | 0.8010   |
| rs7324557  | <i>TNFRSF19;MIPEP</i> (intergenic) | 13  | 24,296,862  | A/G    | Gastroc $k$ | 0.296 | 0.014 (0.052) | 0.795 | 152 | 0     | 0.4145   |
| rs1546570  | <i>DIS3L</i> (intronic)            | 15  | 66,595,775  | A/C    | Gastroc $k$ | 0.187 | 0.111 (0.06)  | 0.065 | 152 | 0     | 0.5755   |

Abbreviations: rsID - dbSNP rsID; locus name, variant annotation; Chr - chromosome; Pos - Build 37 position; EA/ALT - Effect allele and alternative allele; Trait, Gastroc  $k$  - Gastrocnemius muscle oxygen consumption recovery rate constant ( $k$ ); EAF - Effect allele frequency;  $\beta$  (SE)/Z-score - effect estimate and standard error for a quantitative trait and Z-score for example for a binary trait;  $P$  -  $P$ -value for association; N - number of samples analyzed;  $I^2$  - Heterogeneity; Het\_ $P$  -  $P$ -value for heterogeneity between AA and NHW ancestry.

**Table S4.** Associations between candidate SNPs and muscle oxidative capacity inferred from *gastrocnemius* oxygen consumption recovery rate constant (*k*) in smokers without COPD (n=60). Associations were corrected for age, weight, FEV<sub>1</sub> %predicted, number of steps per day, and the principal components of genetic ancestry.

| rsID       | Locus name                         | Chr | Position    | EA/ALT | Trait            | EAF   | β (SE)        | P     | N  | I <sup>2</sup> | Het_P  |
|------------|------------------------------------|-----|-------------|--------|------------------|-------|---------------|-------|----|----------------|--------|
| rs11574    | <i>ID3</i> (nonsynonymous)         | 1   | 23,885,498  | C/T    | Gastroc <i>k</i> | 0.891 | 0.075 (0.148) | 0.613 | 60 | 27.5           | 0.2402 |
| rs10497520 | <i>TTN</i> (nonsynonymous)         | 2   | 179,644,855 | T/C    | Gastroc <i>k</i> | 0.458 | 0.044 (0.089) | 0.618 | 60 | 0              | 0.3343 |
| rs3770991  | <i>NRP2</i> (intronic)             | 2   | 206,655,739 | A/G    | Gastroc <i>k</i> | 0.784 | 0.01 (0.11)   | 0.930 | 60 | 0              | 0.5572 |
| rs2457571  | <i>SLC22A3</i> (intronic)          | 6   | 160,834,828 | T/C    | Gastroc <i>k</i> | 0.250 | 0.191 (0.104) | 0.068 | 60 | 0              | 0.5038 |
| rs4257918  | <i>CPVL</i> (intronic)             | 7   | 29,053,849  | A/G    | Gastroc <i>k</i> | 0.134 | 0.055 (0.113) | 0.625 | 60 | 0              | 0.5910 |
| rs7386139  | <i>DEPTOR</i> (intronic)           | 8   | 121,027,419 | G/A    | Gastroc <i>k</i> | 0.817 | 0.048 (0.104) | 0.643 | 60 | 20.1           | 0.2634 |
| rs6481619  | <i>SVIL</i> (intronic)             | 10  | 29,982,954  | A/C    | Gastroc <i>k</i> | 0.767 | 0.089 (0.097) | 0.360 | 60 | 0              | 0.4534 |
| rs2792022  | <i>BTA1</i> (intronic)             | 10  | 93,740,429  | T/C    | Gastroc <i>k</i> | 0.883 | 0.128 (0.123) | 0.299 | 60 | 0              | 0.9642 |
| rs2251375  | <i>H19</i> (ncRNA intronic)        | 11  | 2,019,496   | C/A    | Gastroc <i>k</i> | 0.435 | 0.096 (0.082) | 0.241 | 60 | 26.6           | 0.2433 |
| rs7324557  | <i>TNFRSF19;MIPEP</i> (intergenic) | 13  | 24,296,862  | A/G    | Gastroc <i>k</i> | 0.258 | 0.05 (0.089)  | 0.579 | 60 | 0              | 0.7677 |
| rs1546570  | <i>DIS3L</i> (intronic)            | 15  | 66,595,775  | A/C    | Gastroc <i>k</i> | 0.225 | 0.131 (0.091) | 0.149 | 60 | 0              | 0.7485 |

Abbreviations: rsID - dbSNP rsID; locus name, variant annotation; Chr - chromosome; Pos - Build 37 position; EA/ALT - Effect allele and alternative allele; Trait, Gastroc *k* - Gastrocnemius muscle oxygen consumption recovery rate constant (*k*); EAF - Effect allele frequency; β (SE)/Z-score - effect estimate and standard error for a quantitative trait and Z-score for example for a binary trait; P - P-value for association; N - number of samples analysed; I<sup>2</sup> - Heterogeneity; Het\_P - P-value for heterogeneity between AA and NHW ancestry.

**Table S5.** Associations between candidate SNPs and muscle oxidative capacity inferred from *gastrocnemius* oxygen consumption recovery rate constant ( $k$ ) in smokers with moderate to severe COPD ( $n=57$ ). Associations were corrected for age, weight, FEV<sub>1</sub> %predicted, number of steps per day, and the principal components of genetic ancestry.

| rsID       | Locus name                         | Chr | Position    | EA/ALT | Trait       | EAF   | $\beta$ (SE)  | $P$   | N  | $I^2$ | Het_ $P$ |
|------------|------------------------------------|-----|-------------|--------|-------------|-------|---------------|-------|----|-------|----------|
| rs11574    | <i>ID3</i> (nonsynonymous)         | 1   | 23,885,498  | C/T    | Gastroc $k$ | 0.789 | 0.09 (0.072)  | 0.209 | 57 | 83.4  | 0.0141   |
| rs10497520 | <i>TTN</i> (nonsynonymous)         | 2   | 179,644,855 | T/C    | Gastroc $k$ | 0.211 | 0.119 (0.071) | 0.093 | 57 | 0     | 0.9780   |
| rs3770991  | <i>NRP2</i> (intronic)             | 2   | 206,655,739 | A/G    | Gastroc $k$ | 0.099 | 0.051 (0.087) | 0.560 | 57 | 9.3   | 0.2938   |
| rs2457571  | <i>SLC22A3</i> (intronic)          | 6   | 160,834,828 | T/C    | Gastroc $k$ | 0.548 | 0.020 (0.087) | 0.820 | 42 | 0     | 1.0000   |
| rs4257918  | <i>CPVL</i> (intronic)             | 7   | 29,053,849  | A/G    | Gastroc $k$ | 0.159 | 0.128 (0.076) | 0.094 | 57 | 0     | 0.4917   |
| rs7386139  | <i>DEPTOR</i> (intronic)           | 8   | 121,027,419 | G/A    | Gastroc $k$ | 0.219 | 0.159 (0.08)  | 0.047 | 57 | 0     | 0.4303   |
| rs6481619  | <i>SVIL</i> (intronic)             | 10  | 29,982,954  | A/C    | Gastroc $k$ | 0.746 | 0.152 (0.061) | 0.013 | 57 | 0     | 0.5385   |
| rs2792022  | <i>BTA1</i> (intronic)             | 10  | 93,740,429  | T/C    | Gastroc $k$ | 0.789 | 0.196 (0.098) | 0.046 | 57 | 41.6  | 0.1906   |
| rs2251375  | <i>H19</i> (ncRNA intronic)        | 11  | 2,019,496   | C/A    | Gastroc $k$ | 0.415 | 0.007 (0.057) | 0.900 | 57 | 88    | 0.0039   |
| rs7324557  | <i>TNFRSF19;MIPEP</i> (intergenic) | 13  | 24,296,862  | A/G    | Gastroc $k$ | 0.710 | 0.066 (0.066) | 0.312 | 57 | 0     | 0.4190   |
| rs1546570  | <i>DIS3L</i> (intronic)            | 15  | 66,595,775  | A/C    | Gastroc $k$ | 0.149 | 0.075 (0.112) | 0.502 | 57 | 0     | 0.6657   |

Abbreviations: rsID - dbSNP rsID; locus name, variant annotation; Chr - chromosome; Pos - Build 37 position; EA/ALT - Effect allele and alternative allele; Trait, Gastroc  $k$  - Gastrocnemius muscle oxygen consumption recovery rate constant ( $k$ ); EAF - Effect allele frequency;  $\beta$  (SE)/Z-score - effect estimate and standard error for a quantitative trait and Z-score for example for a binary trait;  $P$  -  $P$ -value for association; N - number of samples analysed;  $I^2$  - Heterogeneity; Het\_ $P$  -  $P$ -value for heterogeneity between AA and NHW ancestry.
