# Supplementary material for: Genetic variants predicting aerobic capacity response to training are also associated with skeletal muscle oxidative capacity in moderate-to-severe COPD
Source: PubMed Central journal article supplement (PMC6172613; doi:10.1152/physiolgenomics.00140.2017), 2018-05-25
Supplement: Appendix3-suppl.pdf [file Appendix3-suppl.pdf]

### **Appendix 3: Supplemental Materials**

#### **LIST OF CONSORTIUM MEMBERS (in alphabetical order)**

Adami Alessandra, Rehabilitation Clinical Trials Center, Division of Pulmonary and Critical Care Physiology and Medicine, Los Angeles Biomedical Research Institute at Harbor-UCLA Medical Center, Torrance, CA, USA; and Department of Kinesiology, University of Rhode Island, Kingston, RI, USA. (aadami@uri.edu)

Richard Casaburi, Rehabilitation Clinical Trials Center, Division of Pulmonary Critical Care Physiology and Medicine, Los Angeles Biomedical Research Institute at Harbor-UCLA Medical Center, Torrance, CA, USA. (casaburi@ucla.edu)

Michael H. Cho, Channing Division of Network Medicine, Brigham and Women's Hospital, Boston, MA, USA; and Division of Pulmonary and Critical Care Medicine, Brigham and Women's Hospital, Boston, MA, USA. (remhc@channing.harvard.edu)

Brian D. Hobbs, Channing Division of Network Medicine, Brigham and Women's Hospital, Boston, MA, USA; and Division of Pulmonary and Critical Care Medicine, Brigham and Women's Hospital, Boston, MA, USA. (rebdh@channing.harvard.edu)

Merry-Lynn McDonald, Division of Pulmonary, Allergy and Critical Care Medicine, University of Alabama at Birmingham, Birmingham, AL, USA. (mldonnelly@uabmc.edu)

Janos Porszasz, Rehabilitation Clinical Trials Center, Division of Pulmonary and Critical Care Physiology and Medicine, Los Angeles Biomedical Research Institute at Harbor-UCLA Medical Center, Torrance, CA, USA. (porszasz@ucla.edu)

Harry B. Rossiter, Rehabilitation Clinical Trials Center, Division of Pulmonary and Critical Care Physiology and Medicine, Los Angeles Biomedical Research Institute at Harbor-UCLA Medical Center, Torrance, CA, USA; and Faculty of Biological Sciences University of Leeds, Leeds, UK. (hrossiter@ucla.edu)

Edwin K. Silverman, Channing Division of Network Medicine, Brigham and Women's Hospital, Boston, MA, USA; and Division of Pulmonary and Critical Care Medicine, Brigham and Women's Hospital, Boston, MA, USA. (reeks@channing.harvard.edu)

William Stringer, Rehabilitation Clinical Trials Center, Division of Pulmonary and Critical Care Physiology and Medicine, Los Angeles Biomedical Research Institute at Harbor-UCLA Medical Center, Torrance, CA, USA. (stringer@ucla.edu)

For the COPDGene Investigators

## **MATERIALS AND METHODS**

Each participant visited the laboratory once for approximately 3 hours. The visit included medical and smoking history questionnaires, spirometry, blood sample for genetic sequencing, and muscle oxidative capacity test using near-infrared spectroscopy. At the completion of the visit, each participant was provided with a triaxial accelerometer (Dynaport, McRoberts, NL) to wear in the small of the back and held in place by an elastic belt to determine daily step counts.

*Spirometry:* Approximately 15 minutes before spirometric testing, participants inhaled two puffs of metered dose albuterol sulfate (ProAir HFA, Teva Respiratory, Horsham, PA, USA). Spirometry was performed in accordance with the American Thoracic Society guidelines (6) using a dual beam Doppler ultrasound-based spirometer (EasyOne Pro, Ndd Medical, Zürich, Switzerland) (9). Forced expiratory volume in 1 second (FEV<sub>1</sub>) and forced vital capacity (FVC) were measured from the greatest FEV<sub>1</sub> and FVC over up to eight maximum expiratory maneuvers, where the greatest two measurements were within 150 mL.

*Genetic analyses:* Genotyping for the COPDGene study was performed on the Illumina Human Omni-1 Quad array with imputation using the Haplotype Reference Consortium on the Michigan Imputation Server. Quality control details of the COPDGene genotyping data is given in Appendix 2, Table 2. SNPs were annotated using wANNOVAR (3, 12, 15). Linear regression with an additive genetic model was performed to identify the association of k with each of the 11 SNPs, adjusting for age, weight, pulmonary function (FEV<sub>1</sub>% predicted), physical activity (steps/day) and principal components of genetic ancestry using PLINK2.0 ([www.cog-genomics.org/plink/2.0/](http://www.cog-genomics.org/plink/2.0/); 2). Additional models were run without an adjustment for steps/day.

NHW and AA individuals were analyzed separately and results were combined in a fixed-effects meta-analysis in METAL (13) resulting in a total sample size of 152 in the fully adjusted model.

*Muscle oxidative capacity.* We applied a protocol recently validated on smokers with and without COPD (1) on the medial *gastrocnemius* muscle. A continuous-wave, spatially-resolved spectroscopy (SRS) NIRS device (PortaMon, Artinis, The Netherlands) was used to measure the relative concentrations of oxygenated and deoxygenated hemoglobin ( $\text{HbO}_2$  and HHb), and the tissue saturation index was determined using the SRS approach (TSI, %) (4). With the participant lying supine, the NIRS probe was placed longitudinally on the belly of the medial *gastrocnemius*. A rapid-inflation pressure-cuff (SC12D, Hokanson, USA) was placed on the proximal thigh of the same limb and attached to an electronically-controlled rapid cuff-inflator (E20, Hokanson, USA). All participants completed an initial familiarization consisting of a short series of sub-maximal muscle contractions and familiarization with the sensations of rapid-cuff inflation around the thigh from low to high pressures (~50-250 mm Hg). Familiarization was also used to establish arterial occlusion pressure from a tolerated cuff-pressure ~250 mm Hg accompanied by progressive muscle desaturation with constant muscle total hemoglobin ( $\text{THb} = \text{HbO}_2 + \text{HHb}$ ). The participant was asked to relax and refrain from moving the leg except when instructed. The assessment began with 2-3 minutes of resting baseline measurement of *gastrocnemius* TSI and fingertip pulse oximetry (Rad-5 Pulse Oximeter MasimoSET®, Masimo Co., Irvine, CA). Following this, a physiological normalization was performed with complete arterial occlusion of the thigh until constant (low) TSI was achieved or 5 minutes, whichever was the sooner. This value was used to normalize NIRS signals to the maximum and minimum physiologic range. After ~5 minutes resting to re-establish baseline hemodynamics, the participant performed two muscle oxidative capacity assessments, each consisting of ~10-15 s sub-maximal rhythmic muscle contractions followed by a series of intermittent arterial occlusions (5 occlusions for 5 s, and 10 for 10 s, each separated by 5-20 s recovery). The two muscle oxidative capacity assessments were separated by ~1-2 minutes of resting recovery. Afterwards the adipose tissue thickness was estimated at the NIRS site using a skinfold caliper (Lange Skinfold Caliper, Beta Technology Inc., Santa Cruz, CA). From the NIRS data relative muscle oxygen consumption (in units of % change in TSI per second) was determined during each post-contraction arterial occlusion and was used to construct muscle oxygen consumption recovery kinetics. The exponential recovery rate constant,  $k$ , was characterized using non-linear least squares fitting, as preciously described (Origin 8.6, OriginLab, MA, USA; 1). Muscle oxygen consumption recovery  $k$  is linearly associated with muscle oxidative capacity (10, 14).

*Daily step counts by triaxial accelerometry:* Physical activity was assessed objectively using a portable triaxial accelerometer (DynaPort ADL-monitor, McRoberts BV, NL) that has been validated in healthy, elderly and COPD patients (5, 7, 8, 11). At the end of the clinic visit, participants received instructions on wearing the monitoring device around their waist for 7 consecutive days. Participants were instructed to wear the DynaPort accelerometer for 24 hours per day, and only to remove it for bathing. Valid measurements were determined by at least 94% wearing compliance within a total of at least five 24-hour periods. After completion of the 7<sup>th</sup> day of wearing the device was delivered back to laboratory for data download and analysis using the manufacturer's algorithms (MoveMonitor version 2.8).

**Table S1. Genotyped and imputed SNPs with accuracy of imputation**

| rsID       | Locus name<br>(substitution class) | Chr | Position    | Genotyped or<br>Imputed | AA Rsq  | NHW Rsq |
|------------|------------------------------------|-----|-------------|-------------------------|---------|---------|
| rs11574    | <i>ID3</i> (nonsynonymous)         | 1   | 23,885,498  | genotyped               |         |         |
| rs10497520 | <i>TTN</i> (nonsynonymous)         | 2   | 179,644,855 | genotyped               |         |         |
| rs3770991  | <i>NRP2</i> (intronic)             | 2   | 206,655,739 | imputed                 | 0.92124 | 0.99049 |
| rs2457571  | <i>SLC22A3</i> (intronic)          | 6   | 160,834,828 | genotyped               |         |         |
| rs4257918  | <i>CPVL</i> (intronic)             | 7   | 29,053,849  | imputed                 | 0.98837 | 0.99902 |
| rs7386139  | <i>DEPTOR</i> (intronic)           | 8   | 121,027,419 | genotyped               |         |         |
| rs6481619  | <i>SVIL</i> (intronic)             | 10  | 29,982,954  | genotyped               |         |         |
| rs2792022  | <i>BTA1</i> (intronic)             | 10  | 93,740,429  | genotyped               |         |         |
| rs2251375  | <i>H19</i> (ncRNA_intronic)        | 11  | 2,019,496   | imputed                 | 0.97513 | 0.99245 |
| rs7324557  | <i>TNFRSF19;MIPEP</i> (intergenic) | 13  | 24,296,862  | genotyped               |         |         |
| rs1546570  | <i>DIS3L</i> (intronic)            | 15  | 66,595,775  | imputed                 | 0.99840 | 0.99986 |

Abbreviations: rsID - dbSNP rsID; locus name - variant annotation; Chr - chromosome; Position - Build 37 position; AA Rsq – imputation quality score in African American COPDGene participants, NHW Rsq – imputation quality score in Non-Hispanic White COPDGene participants

**Table S2.** Associations stratified by ancestry between candidate SNPs and muscle oxidative capacity inferred from *gastrocnemius* oxygen consumption recovery rate constant (*k*) in the complete cohort (n=152). Associations were corrected for age, weight, FEV<sub>1</sub> %predicted, number of steps per day.

| rsID       | Locus name                         | Chr | Position    | EA/ALT | Trait            | African American |                |          |    | Non-Hispanic White |                |          |    |
|------------|------------------------------------|-----|-------------|--------|------------------|------------------|----------------|----------|----|--------------------|----------------|----------|----|
|            |                                    |     |             |        |                  | EAF              | $\beta$ (SE)   | <i>P</i> | N  | EAF                | $\beta$ (SE)   | <i>P</i> | N  |
| rs11574    | <i>ID3</i> (nonsynonymous)         | 1   | 23,885,498  | C/T    | Gastroc <i>k</i> | 0.939            | 0.322 (0.164)  | 0.054    | 66 | 0.744              | -0.03 (0.07)   | 0.671    | 86 |
| rs10497520 | <i>TTN</i> (nonsynonymous)         | 2   | 179,644,855 | T/C    | Gastroc <i>k</i> | 0.576            | 0.141 (0.076)  | 0.069    | 66 | 0.105              | 0.047 (0.106)  | 0.655    | 86 |
| rs3770991  | <i>NRP2</i> (intronic)             | 2   | 206,655,739 | A/G    | Gastroc <i>k</i> | 0.239            | -0.018 (0.097) | 0.857    | 66 | 0.086              | 0.191 (0.123)  | 0.124    | 86 |
| rs2457571  | <i>SLC22A3</i> (intronic)          | 6   | 160,834,828 | T/C    | Gastroc <i>k</i> | 0.106            | 0.057 (0.124)  | 0.647    | 66 | 0.541              | 0.118 (0.063)  | 0.062    | 86 |
| rs4257918  | <i>CPVL</i> (intronic)             | 7   | 29,053,849  | A/G    | Gastroc <i>k</i> | 0.192            | 0.003 (0.093)  | 0.979    | 66 | 0.122              | 0.022 (0.107)  | 0.835    | 86 |
| rs7386139  | <i>DEPTOR</i> (intronic)           | 8   | 121,027,419 | G/A    | Gastroc <i>k</i> | 0.152            | 0.012 (0.112)  | 0.917    | 66 | 0.238              | 0.049 (0.081)  | 0.547    | 86 |
| rs6481619  | <i>SVIL</i> (intronic)             | 10  | 29,982,954  | A/C    | Gastroc <i>k</i> | 0.795            | 0.151 (0.089)  | 0.096    | 66 | 0.738              | -0.011 (0.079) | 0.884    | 86 |
| rs2792022  | <i>BTAF1</i> (intronic)            | 10  | 93,740,429  | T/C    | Gastroc <i>k</i> | 0.947            | 0.112 (0.178)  | 0.533    | 66 | 0.721              | 0.133 (0.073)  | 0.070    | 86 |
| rs2251375  | <i>H19</i> (ncRNA_intronic)        | 11  | 2,019,496   | C/A    | Gastroc <i>k</i> | 0.386            | 0.041 (0.08)   | 0.609    | 66 | 0.622              | 0.068 (0.069)  | 0.326    | 86 |
| rs7324557  | <i>TNFRSF19;MIPEP</i> (intergenic) | 13  | 24,296,862  | A/G    | Gastroc <i>k</i> | 0.257            | 0.067 (0.084)  | 0.426    | 66 | 0.326              | -0.02 (0.066)  | 0.763    | 86 |
| rs1546570  | <i>DIS3L</i> (intronic)            | 15  | 66,595,775  | A/C    | Gastroc <i>k</i> | 0.136            | 0.065 (0.102)  | 0.525    | 66 | 0.227              | 0.136 (0.075)  | 0.072    | 86 |

Abbreviations: rsID - dbSNP rsID; locus name, variant annotation; Chr - chromosome; Pos - Build 37 position; EA/ALT - Effect allele and alternative allele; Trait, Gastroc *k* - Gastrocnemius muscle oxygen consumption recovery rate constant (*k*); EAF - Effect allele frequency;  $\beta$  (SE)/Z-score - effect estimate and standard error for a quantitative trait and Z-score for example for a binary trait; *P* - *P*-value for association; N - number of samples analyzed

**Table S3.** Associations stratified by ancestry between candidate SNPs and muscle oxidative capacity inferred from *gastrocnemius* oxygen consumption recovery rate constant (*k*) in smokers without COPD (n=60). Associations were corrected for age, weight, FEV<sub>1</sub> %predicted, number of steps per day.

| rsID       | Locus name                         | Chr | Position    | EA/ALT | Trait            | African American |               |          |    | Non-Hispanic White |                |          |    |
|------------|------------------------------------|-----|-------------|--------|------------------|------------------|---------------|----------|----|--------------------|----------------|----------|----|
|            |                                    |     |             |        |                  | EAF              | $\beta$ (SE)  | <i>P</i> | N  | EAF                | $\beta$ (SE)   | <i>P</i> | N  |
| rs11574    | <i>ID3</i> (nonsynonymous)         | 1   | 23,885,498  | C/T    | Gastroc <i>k</i> | 0.975            | 0.409 (0.321) | 0.210    | 40 | 0.725              | -0.016 (0.167) | 0.925    | 20 |
| rs10497520 | <i>TTN</i> (nonsynonymous)         | 2   | 179,644,855 | T/C    | Gastroc <i>k</i> | 0.600            | 0.086 (0.099) | 0.390    | 40 | 0.175              | -0.134 (0.205) | 0.522    | 20 |
| rs3770991  | <i>NRP2</i> (intronic)             | 2   | 206,655,739 | A/G    | Gastroc <i>k</i> | 0.746            | 0.045 (0.125) | 0.721    | 40 | 0.861              | -0.108 (0.229) | 0.642    | 20 |
| rs2457571  | <i>SLC22A3</i> (intronic)          | 6   | 160,834,828 | T/C    | Gastroc <i>k</i> | 0.100            | 0.095 (0.178) | 0.597    | 40 | 0.550              | 0.241 (0.129)  | 0.078    | 20 |
| rs4257918  | <i>CPVL</i> (intronic)             | 7   | 29,053,849  | A/G    | Gastroc <i>k</i> | 0.152            | 0.087 (0.128) | 0.500    | 40 | 0.100              | -0.062 (0.246) | 0.804    | 20 |
| rs7386139  | <i>DEPTOR</i> (intronic)           | 8   | 121,027,419 | G/A    | Gastroc <i>k</i> | 0.825            | 0.141 (0.133) | 0.296    | 40 | 0.800              | -0.098 (0.168) | 0.565    | 20 |
| rs6481619  | <i>SVIL</i> (intronic)             | 10  | 29,982,954  | A/C    | Gastroc <i>k</i> | 0.788            | 0.141 (0.119) | 0.245    | 40 | 0.725              | -0.013 (0.168) | 0.937    | 20 |
| rs2792022  | <i>BTAF1</i> (intronic)            | 10  | 93,740,429  | T/C    | Gastroc <i>k</i> | 0.950            | 0.119 (0.237) | 0.619    | 40 | 0.750              | 0.131 (0.144)  | 0.374    | 20 |
| rs2251375  | <i>H19</i> (ncRNA_intronic)        | 11  | 2,019,496   | C/A    | Gastroc <i>k</i> | 0.366            | 0.148 (0.093) | 0.121    | 40 | 0.575              | -0.08 (0.172)  | 0.647    | 20 |
| rs7324557  | <i>TNFRSF19;MIPEP</i> (intergenic) | 13  | 24,296,862  | A/G    | Gastroc <i>k</i> | 0.262            | 0.066 (0.106) | 0.534    | 40 | 0.250              | 0.008 (0.167)  | 0.962    | 20 |
| rs1546570  | <i>DIS3L</i> (intronic)            | 15  | 66,595,775  | A/C    | Gastroc <i>k</i> | 0.162            | 0.104 (0.125) | 0.412    | 40 | 0.350              | 0.162 (0.133)  | 0.237    | 20 |

Abbreviations: rsID - dbSNP rsID; locus name, variant annotation; Chr - chromosome; Pos - Build 37 position; EA/ALT - Effect allele and alternative allele; Trait, Gastroc *k* - Gastrocnemius muscle oxygen consumption recovery rate constant (*k*); EAF - Effect allele frequency;  $\beta$  (SE)/Z-score - effect estimate and standard error for a quantitative trait and Z-score for example for a binary trait; *P* - *P*-value for association; N - number of samples analyzed

**Table S4.** Associations stratified by ancestry between candidate SNPs and muscle oxidative capacity inferred from *gastrocnemius* oxygen consumption recovery rate constant (*k*) in smokers with moderate to severe COPD (n=57). Associations were corrected for age, weight, FEV<sub>1</sub> %predicted, number of steps per day.

| rsID       | Locus name                         | Chr | Position    | EA/ALT | Trait            | African American |               |       |    | Non-Hispanic White |                |       |    |
|------------|------------------------------------|-----|-------------|--------|------------------|------------------|---------------|-------|----|--------------------|----------------|-------|----|
|            |                                    |     |             |        |                  | EAF              | β (SE)        | P     | N  | EAF                | β (SE)         | P     | N  |
| rs11574    | <i>ID3</i> (nonsynonymous)         | 1   | 23,885,498  | C/T    | Gastroc <i>k</i> | 0.867            | 0.273 (0.103) | 0.020 | 15 | 0.762              | -0.079 (0.099) | 0.432 | 42 |
| rs10497520 | <i>TTN</i> (nonsynonymous)         | 2   | 179,644,855 | T/C    | Gastroc <i>k</i> | 0.500            | 0.118 (0.083) | 0.182 | 15 | 0.107              | 0.122 (0.134)  | 0.367 | 42 |
| rs3770991  | <i>NRP2</i> (intronic)             | 2   | 206,655,739 | A/G    | Gastroc <i>k</i> | 0.275            | 0.015 (0.093) | 0.873 | 15 | 0.036              | 0.285 (0.24)   | 0.241 | 42 |
| rs2457571  | <i>SLC22A3</i> (intronic)          | 6   | 160,834,828 | T/C    | Gastroc <i>k</i> | --               | --            | --    | -- | 0.548              | 0.02 (0.087)   | 0.820 | 42 |
| rs4257918  | <i>CPVL</i> (intronic)             | 7   | 29,053,849  | A/G    | Gastroc <i>k</i> | 0.272            | 0.095 (0.09)  | 0.311 | 15 | 0.119              | 0.211 (0.143)  | 0.148 | 42 |
| rs7386139  | <i>DEPTOR</i> (intronic)           | 8   | 121,027,419 | G/A    | Gastroc <i>k</i> | 0.133            | 0.221 (0.112) | 0.070 | 15 | 0.250              | 0.095 (0.114)  | 0.408 | 42 |
| rs6481619  | <i>SVIL</i> (intronic)             | 10  | 29,982,954  | A/C    | Gastroc <i>k</i> | 0.700            | 0.13 (0.071)  | 0.090 | 15 | 0.762              | 0.216 (0.121)  | 0.081 | 42 |
| rs2792022  | <i>BTAF1</i> (intronic)            | 10  | 93,740,429  | T/C    | Gastroc <i>k</i> | 0.967            | 0.417 (0.195) | 0.052 | 15 | 0.726              | 0.122 (0.114)  | 0.292 | 42 |
| rs2251375  | <i>H19</i> (ncRNA_intronic)        | 11  | 2,019,496   | C/A    | Gastroc <i>k</i> | 0.545            | 0.152 (0.076) | 0.067 | 15 | 0.369              | -0.179 (0.086) | 0.044 | 42 |
| rs7324557  | <i>TNFRSF19;MIPEP</i> (intergenic) | 13  | 24,296,862  | A/G    | Gastroc <i>k</i> | 0.767            | 0.015 (0.092) | 0.875 | 15 | 0.690              | 0.121 (0.094)  | 0.207 | 42 |
| rs1546570  | <i>DIS3L</i> (intronic)            | 15  | 66,595,775  | A/C    | Gastroc <i>k</i> | 0.033            | -0.01 (0.227) | 0.964 | 15 | 0.190              | 0.102 (0.128)  | 0.430 | 42 |

Abbreviations: rsID - dbSNP rsID; locus name, variant annotation; Chr - chromosome; Pos - Build 37 position; EA/ALT - Effect allele and alternative allele; Trait, Gastroc *k* - Gastrocnemius muscle oxygen consumption recovery rate constant (*k*); EAF - Effect allele frequency; β (SE)/Z-score - effect estimate and standard error for a quantitative trait and Z-score for example for a binary trait; P - P-value for association; N - number of samples analyzed



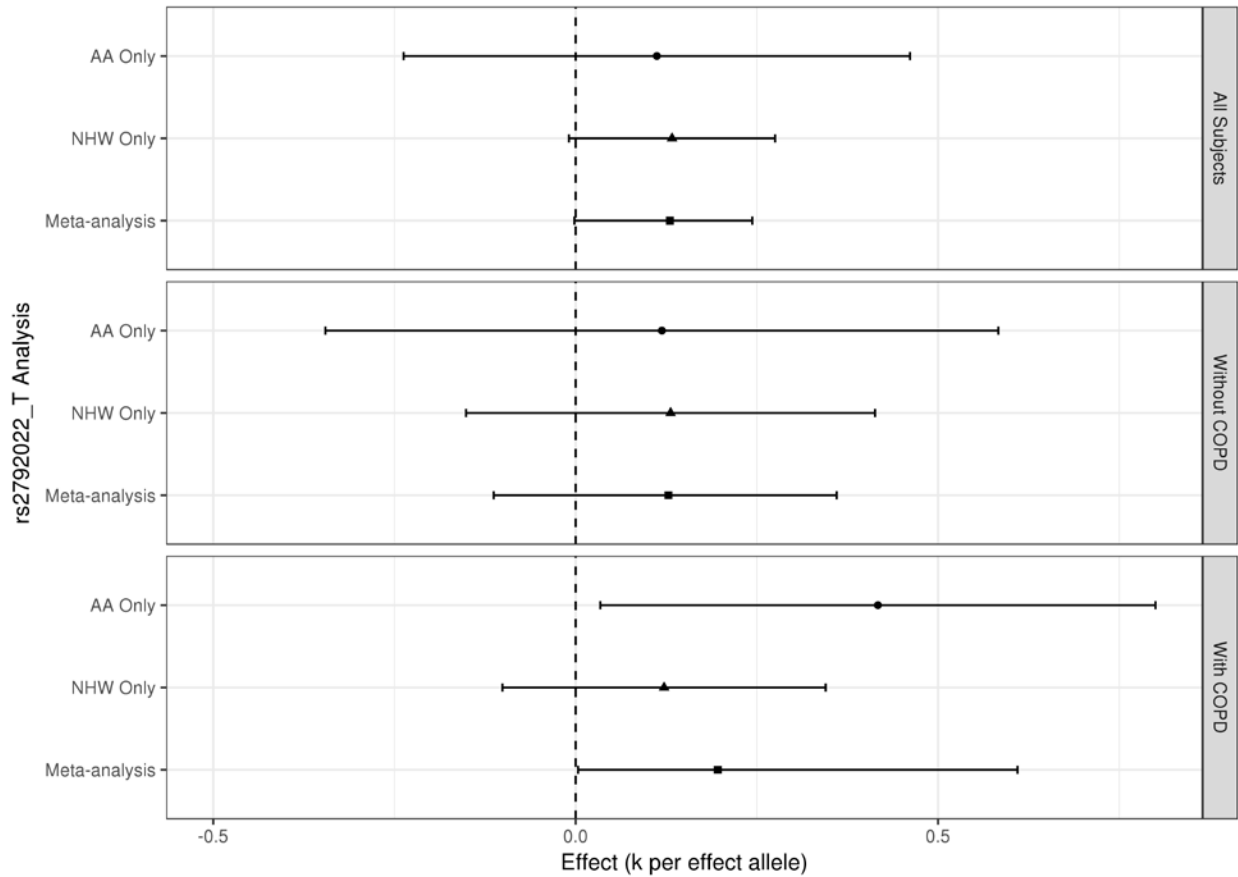

**Figure S1.** The effect on muscle oxygen consumption recovery rate constant (k) of T/C genetic variation on rs2792022 *BTAF1* among all subjects in study, those without COPD and those with moderate-to-severe COPD stratified by genetic ancestry. AA (circle) = African American. NHW (triangle) = Non-Hispanic White. Meta-analysis between genetic ancestry (square). Subjects with COPD were those with moderate-to-severe disease ( $FEV_1/FVC < 0.7$  and  $FEV_1\% \text{ predicted} < 80\%$ ). Error bars in forest plot show 95% confidence intervals.

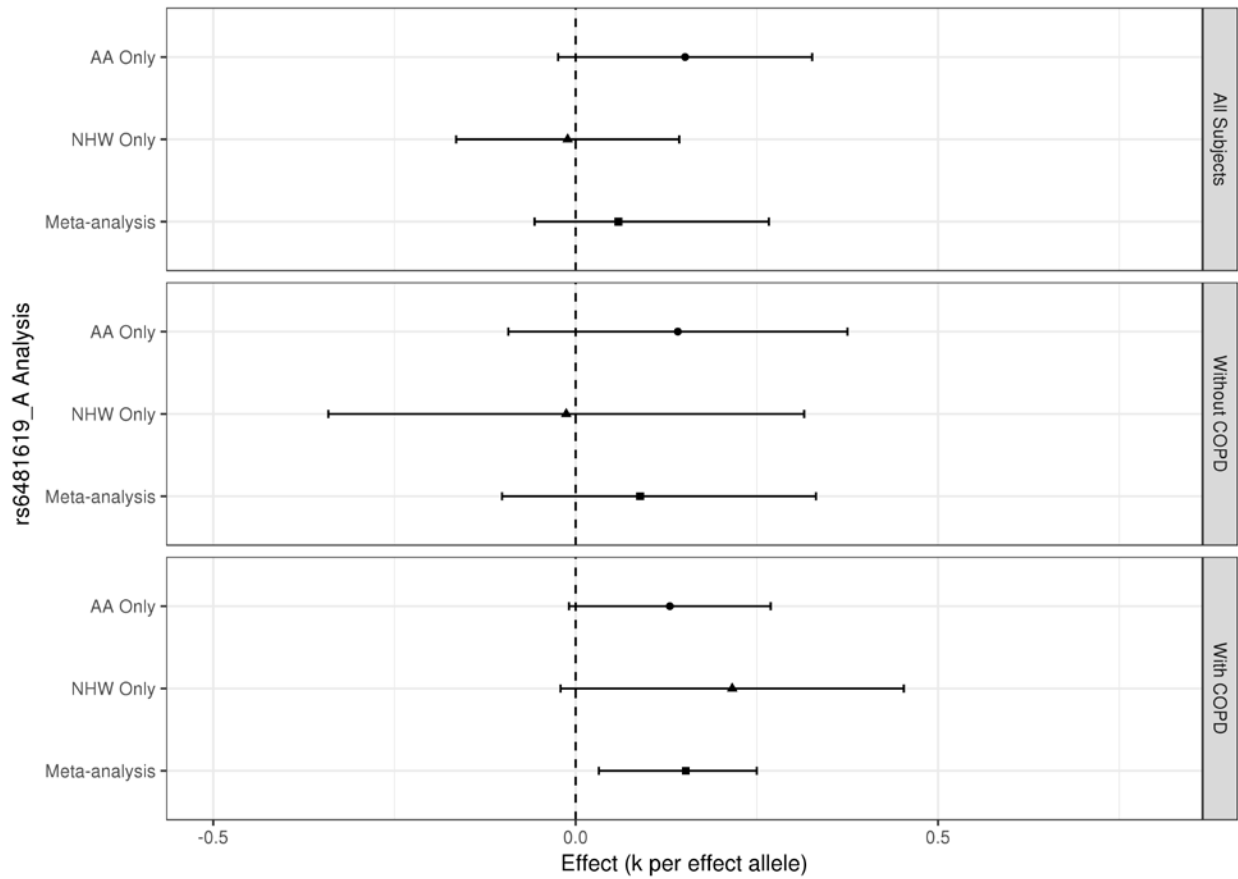

**Figure S2.** The effect on muscle oxygen consumption recovery rate constant ( $k$ ) of G/A genetic variation on rs6481619 *SVIL* among all subjects in study, those without COPD and those with moderate-to-severe COPD stratified by genetic ancestry. AA (circle) = African American. NHW (triangle) = Non-Hispanic White. Meta-analysis between genetic ancestry (square). Subjects with COPD were those with moderate-to-severe disease ( $FEV_1/FVC < 0.7$  and  $FEV_1\% \text{ predicted} < 80\%$ ). Error bars in forest plot show 95% confidence intervals.

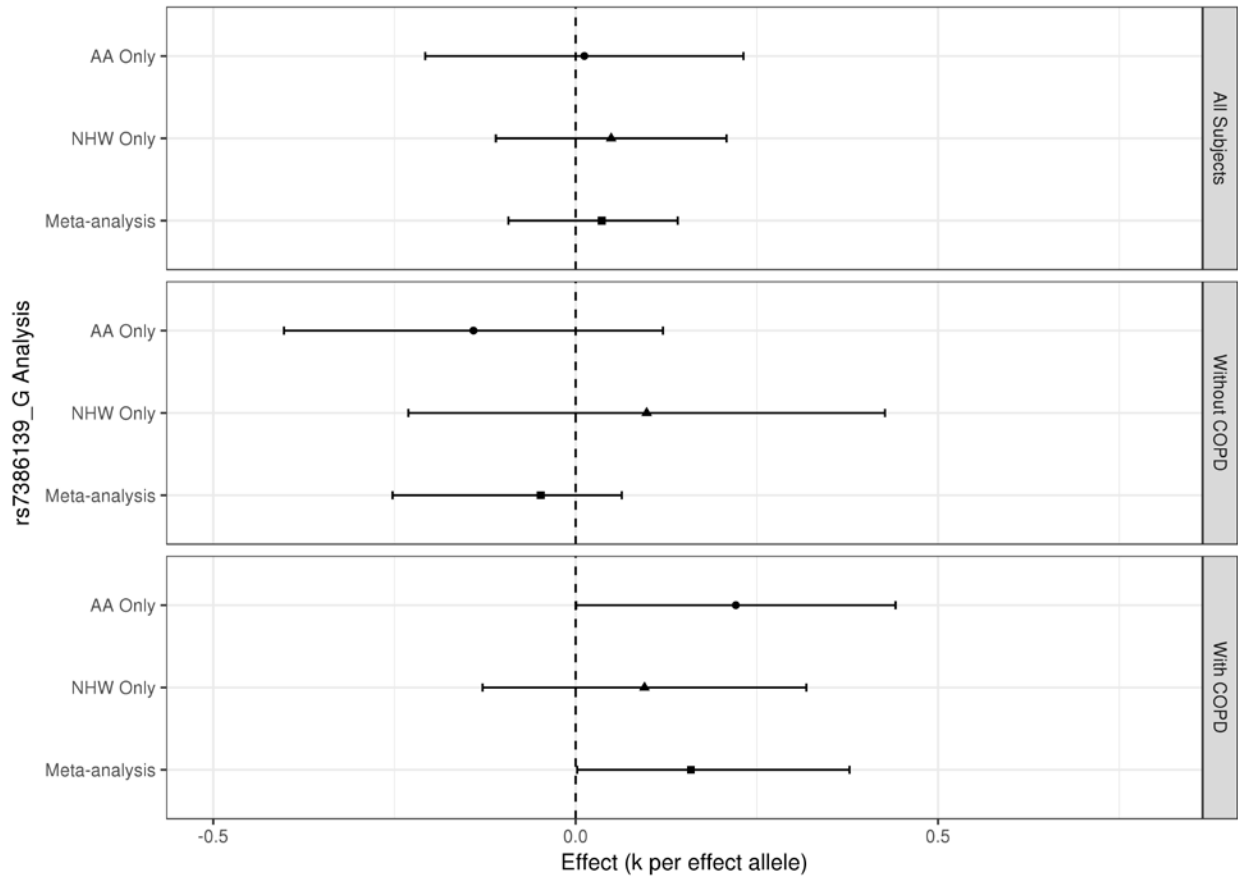

**Figure S3.** The effect on muscle oxygen consumption recovery rate constant ( $k$ ) of G/A genetic variation on rs7386139 *DEPTOR* among all subjects in study, those without COPD and those with moderate-to-severe COPD stratified by genetic ancestry. AA (circle) = African American. NHW (triangle) = Non-Hispanic White. Meta-analysis between genetic ancestry (square). Subjects with COPD were those with moderate-to-severe disease ( $FEV_1/FVC < 0.7$  and  $FEV_1\% \text{ predicted} < 80\%$ ). Error bars in forest plot show 95% confidence intervals

## REFERENCES

1. **Adami A, Cao R, Porszasz J, Casaburi R, Rossiter HB.** Reproducibility of NIRS assessment of muscle oxidative capacity in smokers with and without COPD. *Respir Physiol Neurobiol* 235:18-26, 2017.
2. **Chang CC, Chow CC, Tellier LC, Vattikuti S, Purcell SM, Lee JJ.** Second-generation PLINK: rising to the challenge of larger and richer datasets. *Gigascience* 4:7, 2015.
3. **Chang X, Wang K.** wANNOVAR: annotating genetic variants for personal genomes via the web. *J Med Genet* 49:433-6, 2012.
4. **Ferrari M, Mottola L, Quaresima V.** Principles, techniques, and limitations of near infrared spectroscopy. *Can J Appl Physiol* 29:463-487, 2004.
5. **Kanda M, Minakata Y, Matsunaga K, Sugiura H, Hirano T, Koarai A, Akamatsu K, Ichikawa T, Ichinose M.** Validation of the triaxial accelerometer for the evaluation of physical activity in Japanese patients with COPD. *Intern Med* 51:369-375, 2012.
6. **Miller MR, Crapo R, Hankinson J, Brusasco V, Burgos F, Casaburi R, Coates A, Enright P, van der Grinten CP, Gustafsson P, Jensen R, Johnson DC, MacIntyre N, McKay R, Navajas D, Pedersen OF, Pellegrino R, Viegi G, Wanger J.** ATS/ERS Task Force. General considerations for lung function testing. *Eur Respir J* 26:153-161, 2005.
7. **Monteiro F, Camillo CA, Vitorasso R, Sant'Anna T, Hernandez NA, Probst VS, Pitta F.** Obesity and physical activity in the daily life of patients with COPD. *Lung* 190:403-410, 2012.
8. **Pitta F, Troosters T, Spruit MA, Decramer M, Gosselink R.** Activity monitoring for assessment of physical activities in daily life in patients with chronic obstructive pulmonary disease. *Arch Phys Med Rehabil* 86:1979-1985, 2005.
9. **Regan EA, Hokanson JE, Murphy JR, Make B, Lynch DA, Beaty TH, Curran-Everett D, Silverman EK, Crapo JD.** Genetic epidemiology of COPD (COPDGene) study design. *COPD: Journal of Chronic Obstructive Pulmonary Disease* 7:32-43, 2010.
10. **Ryan TE, Brophy P, Lin CT, Hickner RC, Neuffer PD.** Assessment of in vivo skeletal muscle mitochondrial respiratory capacity in humans by near-infrared spectroscopy: a comparison with in situ measurements. *J Physiol* 592:3231-41, 2014.
11. **van Remoortel H, Raste Y, Louvaris Z, Giavedoni S, Burtin C, Langer D, Wilson F, Rabinovich R, Vogiatzis I, Hopkinson NS, Troosters T.** Validity of six activity monitors in chronic obstructive pulmonary disease: a comparison with indirect calorimetry. *PLoS ONE* 7:e39198, 2012.

12. **Wang K, Li M, Hakonarson H.** ANNOVAR: functional annotation of genetic variants from high-throughput sequencing data. *Nucleic Acids Res* 38:e164, 2010.
13. **Willer CJ, Li Y, Abecasis GR.** METAL: fast and efficient meta-analysis of genomewide association scans. *Bioinformatics* 26:2190-2191, 2010.
14. **Wüst RC, van der Laarse WJ, Rossiter HB.** On-off asymmetries in oxygen consumption kinetics of single *Xenopus laevis* skeletal muscle fibres suggest higher-order control. *J Physiol* 591:731-44, 2013.
15. **Yang H, Wang K.** Genomic variant annotation and prioritization with ANNOVAR and wANNOVAR. *Nat Protoc* 10:1556-1566, 2015.
